# Supplementary material for: Gatifloxacin versus ceftriaxone for uncomplicated enteric fever in Nepal: an open-label, two-centre, randomised controlled trial
Source: PubMed Central journal article supplement (PMC4835582; doi:10.1016/s1473-3099(15)00530-7), 2016-05
Supplement: mmc1.pdf [file mmc1.pdf]

# THE LANCET Infectious Diseases

## Supplementary webappendix

This webappendix formed part of the original submission and has been peer reviewed. We post it as supplied by the authors.

Supplement to: Arjyal A, Basnyat B, Nhan HT, et al. Gatifloxacin versus ceftriaxone for uncomplicated enteric fever in Nepal: an open-label, two-centre, randomised controlled trial. *Lancet Infect Dis* 2016; published online Jan 19. [http://dx.doi.org/10.1016/S1473-3099\(15\)00530-7](http://dx.doi.org/10.1016/S1473-3099(15)00530-7).

**Supplementary table 1. Baseline characteristics by culture result**

| Baseline characteristics                             | n   | Culture-negative<br>(N=123) | n  | <i>Salmonella</i> Paratyphi A<br>(N=35) | n  | <i>Salmonella</i> Typhi<br>(N=81) | Comparison<br>(p-value) * |
|------------------------------------------------------|-----|-----------------------------|----|-----------------------------------------|----|-----------------------------------|---------------------------|
| Age (years) – median (IQR)                           | 123 | 20.0(15.5,26.0)             | 35 | 19.0(12.0,24.0)                         | 81 | 18.0(13.0,22.0)                   | 0.07                      |
| Sex (male)                                           | 123 | 92 (74.8%)                  | 35 | 29 (82.9%)                              | 81 | 59 (72.8%)                        | 0.50                      |
| Temperature (°C) - median (IQR)                      | 119 | 38.8 (38.3,39.4)            | 35 | 38.8 (38.3,39.0)                        | 78 | 39.0 (38.3,39.4)                  | 0.46                      |
| Days of illness before enrolment - median (IQR)      | 123 | 5.0(4.0,6.0)                | 35 | 5.0(4.0,6.5)                            | 81 | 5.0(4.0,7.0)                      | 0.24                      |
| Antibiotics treatment in last two weeks              | 123 | 20 (16.3%)                  | 35 | 6 (17.1%)                               | 81 | 12 (14.8%)                        | 0.94                      |
| Previous history of typhoid                          | 123 | 27 (22.0%)                  | 34 | 4 (11.8%)                               | 81 | 6 (7.48%)                         | 0.02                      |
| Family history of typhoid                            | 123 | 21 (17.1%)                  | 35 | 6 (17.1%)                               | 81 | 8 (9.9%)                          | 0.34                      |
| Typhoid vaccination                                  | 122 | 7 (5.7%)                    | 35 | 3 (8.6%)                                | 81 | 1 (1.2%)                          | 0.12                      |
| Fever                                                | 123 | 123 (100%)                  | 35 | 35 (100%)                               | 80 | 80 (100%)                         | 1.00                      |
| Cough                                                | 117 | 51 (43.6%)                  | 34 | 7 (20.6%)                               | 77 | 22 (28.6%)                        | 0.02                      |
| Constipation                                         | 120 | 11 (9.2%)                   | 35 | 8 (22.9%)                               | 78 | 6 (7.7%)                          | 0.06                      |
| Headache                                             | 120 | 102 (85.0%)                 | 35 | 31 (88.6%)                              | 80 | 74 (92.5%)                        | 0.29                      |
| Diarrhoea                                            | 120 | 17 (14.2%)                  | 35 | 5 (14.3%)                               | 78 | 31 (39.7%)                        | 0.0001                    |
| Vomiting                                             | 119 | 31 (26.1%)                  | 35 | 9 (25.7%)                               | 78 | 22 (28.2%)                        | 0.94                      |
| Abdominal pain                                       | 117 | 26 (22.2%)                  | 35 | 9 (25.7%)                               | 77 | 23 (29.9%)                        | 0.48                      |
| Anorexia                                             | 120 | 78 (65.0%)                  | 35 | 24 (68.6%)                              | 79 | 66 (83.5%)                        | 0.01                      |
| Nausea                                               | 120 | 54 (45.0%)                  | 34 | 13 (38.2%)                              | 76 | 48 (63.2%)                        | 0.02                      |
| Splenomegaly                                         | 120 | 1 (0.8%)                    | 32 | 1 (3.1%)                                | 79 | 0 (0%)                            | 0.37                      |
| Hepatomegaly                                         | 120 | 0(0%)                       | 32 | 0(0%)                                   | 79 | 0(0%)                             | 1.00                      |
| Random blood glucose (mmol/L) - median (IQR)         | 120 | 5.47(4.83, 6.11)            | 35 | 5.33(4.77, 5.63)                        | 79 | 5.38(4.94, 6.02)                  | 0.61                      |
| Creatinine (µmol/L) - median (IQR)                   | 118 | 70.72(61.88, 79.56)         | 35 | 70.72(53.04, 79.56)                     | 77 | 70.72(61.88, 79.56)               | 0.78                      |
| Total Bilirubin (µmol/L)- median (IQR)               | 119 | 13.68(10.26, 17.10)         | 35 | 11.97(10.26, 17.10)                     | 80 | 11.97(8.55, 15.39)                | 0.36                      |
| Leucocyte count (×10 <sup>9</sup> /L) - median (IQR) | 123 | 5.9 (4.7,7.5)               | 35 | 5.7(4.7,6.7)                            | 81 | 5.9 (4.8,6.8)                     | 0.36                      |
| Haematocrit (%) - median (IQR)                       | 122 | 40.0 (36.9,44.0)            | 35 | 40.8(37.6,44.0)                         | 78 | 38.0 (35.2,41.4)                  | 0.02                      |
| Platelet count (×10 <sup>9</sup> /L) - median (IQR)  | 123 | 172.0(150.0,214.5)          | 35 | 171.0(150.5,203.0)                      | 81 | 162.0(146.0,204.0)                | 0.40                      |

|                          |     |                 |    |                 |    |                 |         |
|--------------------------|-----|-----------------|----|-----------------|----|-----------------|---------|
| AST (U/L) - median (IQR) | 120 | 41·0(30·0,58·2) | 35 | 56·0(41·5,79·0) | 78 | 62·0(44·0,80·0) | <0·0001 |
| ALT (U/L) - median (IQR) | 120 | 38·0(27·5,55·2) | 35 | 47·0(35·5,61·5) | 79 | 51·0(40·5,67·0) | 0·0003  |

---

\*Comparison between all three groups was done using Fisher's exact test for categorical variables and the Kruskal-Wallis test for continuous variables.

AST=serum aspartate aminotransferase. ALT=serum alanine aminotransferase. IQR=inter-quartile range.  
n refers to the number of subjects with non-missing data.

**Supplementary table 2. Summary of primary and secondary endpoints for the intention to treat population**

|                                                | Gatifloxacin (N=120)      | Ceftriaxone (N=119)       | Effect size(95%CI); p-value |
|------------------------------------------------|---------------------------|---------------------------|-----------------------------|
| Treatment failure *                            | 18                        | 19                        | HR=1.04 (0.55,1.98); p=0.91 |
| - Fever over 7days                             | 9                         | 14                        |                             |
| - Rescue treatment                             | 10                        | 10                        |                             |
| - Microbiological failures                     | 2                         | 1                         |                             |
| - Enteric fever related complications \$       | 1                         | 0                         |                             |
| - Relapse until day 28                         | 5                         | 3                         |                             |
| Risk of failure until day 28 †                 | 0.15<br>(95%CI:0.09,0.22) | 0.16<br>(95%CI:0.09,0.23) | RD=0.01(-0.09,0.10);p=0.89  |
| Median (IQR) time to fever clearance (days) #  | 2.43(1.09,4.56)           | 2.93(1.44,5.12)           | AF=0.89(0.72,1.11); p=0.31  |
| Relapse until day 28                           | 5                         | 3                         | HR=0.56 (0.13,2.36); p=0.43 |
| - Confirmed relapse until day 28               | 4                         | 3                         |                             |
| - Syndromic relapse until day 28               | 1                         | 0                         |                             |
| Relapse at any time until 6 months €           | 10                        | 7                         | HR=0.67(0.25,1.75); p=0.41  |
| - Confirmed relapse at any time until 6 months | 8                         | 4                         |                             |
| - Syndromic relapse at any time until 6 months | 2                         | 3                         |                             |

HR=hazard ratio of time to event (based on Cox regression). RD=absolute risk difference (based on Kaplan-Meier estimates). AF= acceleration factor (based on a Weibull accelerated failure time model for interval-censored fever clearance time).

\*Patients can have more than one type of treatment failure. \$ This patient was admitted to hospital.

†Kaplan-Meier estimates. #Estimated from Weibull accelerated failure time model. € All relapses occurred within 2 months of enrolment except for a single syndromic relapse on ceftriaxone which occurred on day 142.

**Supplementary table 3. Summary of primary and secondary endpoints for the culture-confirmed population**

|                                                | <b>Gatifloxacin<br/>(N=62)</b> | <b>Ceftriaxone<br/>(N=54)</b> | <b>Effect size(95%CI); p-value</b> |
|------------------------------------------------|--------------------------------|-------------------------------|------------------------------------|
| Treatment failure *                            | 16                             | 4                             | HR=0.24(0.08,0.73); p=0.01         |
| - Fever over 7days                             | 8                              | 2                             |                                    |
| - Rescue treatment                             | 9                              | 1                             |                                    |
| - Microbiological failures                     | 2                              | 1                             |                                    |
| - Enteric fever related complications \$       | 1                              | 0                             |                                    |
| - Relapse until day 28                         | 4                              | 1                             |                                    |
| Risk of failure until day 28 †                 | 0.27<br>(95% CI:0.15,0.38)     | 0.07<br>(95% CI:0.00,0.14)    | RD= -0.20(-0.33,-0.06);p=0.004     |
| Median (IQR) time to fever clearance (days) #  | 4.21(2.63,6.1)                 | 2.78(1.62,4.26)               | AF=1.42(1.15,1.76); p=0.001        |
| Relapse until day 28                           | 4                              | 1                             | HR=0.24(0.027,2.16); p=0.20        |
| - Confirmed relapse until day 28               | 4                              | 1                             |                                    |
| - Syndromic relapse until day 28               | 0                              | 0                             |                                    |
| Relapse at any time until 6 months €           | 6                              | 4                             | HR=0.64(0.18,2.26);p=0.48          |
| - Confirmed relapse at any time until 6 months | 5                              | 1                             |                                    |
| - Syndromic relapse at any time until 6 months | 1                              | 3                             |                                    |
| Faecal carriage in stool £                     |                                |                               |                                    |
| - Month 1                                      | 2/35                           | 0/38                          | -                                  |
| - Month 3                                      | 0/34                           | 0/26                          | -                                  |
| - Month 6                                      | 0/24                           | 0/22                          | -                                  |

HR= hazard ratio of time to event (based on Cox regression). RD=absolute risk difference (based on Kaplan-Meier estimates). AF= acceleration factor (based on a Weibull accelerated failure time model for interval-censored fever clearance time).

\*Patients can have more than one type of treatment failure. \$ This patient was admitted to hospital.

†Kaplan-Meier estimates. # Estimated from Weibull accelerated failure time model. € All relapses occurred within 2 months of enrolment except for a single syndromic relapse on ceftriaxone which occurred on day 142.

£ Denominators correspond to the number of patients with a stool sample at each time point. Faecal carriage was only descriptively analyzed. At month 1, one of the samples was positive for S.Paratyphi A and one for S.Typhi.

**Supplementary table 4. Summary of primary and secondary endpoints for the culture-negative population**

|                                                | <b>Gatifloxacin<br/>(N=58)</b> | <b>Ceftriaxone<br/>(N=65)</b> | <b>Effect size(95%CI);p-value</b> |
|------------------------------------------------|--------------------------------|-------------------------------|-----------------------------------|
| Treatment failure *                            | 2                              | 15                            | HR=7.50(1.71,32.80); p=0.01       |
| - Fever over 7days                             | 1                              | 12                            |                                   |
| - Rescue treatment                             | 1                              | 9                             |                                   |
| - Microbiological failures                     | 0                              | 0                             |                                   |
| - Enteric fever related complications          | 0                              | 0                             |                                   |
| - Relapse until day 28                         | 1                              | 2                             |                                   |
| Risk of failure until day 28 †                 | 0.04<br>(95%CI:0.00,0.08)      | 0.24<br>(95%CI:0.13,0.34)     | RD=0.20(0.09,0.32);p=0.001        |
| Median (IQR) time to fever clearance (days) #  | 1.12(0.39,2.58)                | 3.03(1.31,5.85)               | AF=0.44(0.30,0.65); p<0.0001      |
| Relapse until day 28                           | 1                              | 2                             | HR=1.81(0.16,20.01); p=0.63       |
| - Confirmed relapse until day 28               | 0                              | 2                             |                                   |
| - Syndromic relapse until day 28               | 1                              | 0                             |                                   |
| Relapse at any time until 6 months €           | 4                              | 3                             | HR=0.71(0.16,3.18); p=0.66        |
| - Confirmed relapse at any time until 6 months | 3                              | 3                             |                                   |
| - Syndromic relapse at any time until 6 months | 1                              | 0                             |                                   |

HR= hazard ratio of time to event (based on Cox regression). RD=absolute risk difference (based on Kaplan-Meier estimates). AF= acceleration factor (based on a Weibull accelerated failure time model for interval-censored fever clearance time).

\*Patients can have more than one type of treatment failure.

†Kaplan-Meier estimates. # Estimated from Weibull accelerated failure time model. € All relapses occurred within 2 months of enrolment.

**Supplementary tables 5. Laboratory abnormalities after enrolment: random blood glucose (intention to treat population)**

| <b>Worst random blood glucose grade</b> | <b>n</b> | <b>Gatifloxacin (N=120)</b> | <b>N</b> | <b>Ceftriaxone (N=119)</b> | <b>Comparison (p-value)*</b> |
|-----------------------------------------|----------|-----------------------------|----------|----------------------------|------------------------------|
| Worst hyperglycemia grade               | 120      |                             | 118      |                            | 0.98                         |
| - Grade 0                               |          | 10 (8.3%)                   |          | 11 (9.3%)                  |                              |
| - Grade 1                               |          | 92 (76.7%)                  |          | 87 (73.7%)                 |                              |
| - Grade 2                               |          | 17 (14.2%)                  |          | 20 (16.9%)                 |                              |
| - Grade 3                               |          | 1 (0.8%)                    |          | 0 (0.0%)                   |                              |
| Worst hypoglycemia grade                | 120      |                             | 118      |                            | 0.65                         |
| - Grade 0                               |          | 105 (87.5%)                 |          | 107 (90.7%)                |                              |
| - Grade 1                               |          | 13 (10.8%)                  |          | 8 (6.8%)                   |                              |
| - Grade 2                               |          | 2 (1.7%)                    |          | 3 (2.5%)                   |                              |

\*Based on Cochran-Armitage trend test.

n refers to the number of subjects with at least one non-missing laboratory value after enrolment in each group.

Hyperglycemia: Grade 0 ( $\leq 115$  mg/dL, no hyperglycemia), grade 1 (116-160 mg/dL), grade 2 (161-250 mg/dL), grade 3 (251-500 mg/dL), grade 4 ( $> 500$  mg/dL).

Hypoglycemia: Grade 0 ( $\geq 65$  mg/dL, no hypoglycemia), grade 1 (55-64 mg/dL), grade 2 (40-54 mg/dL), grade 3 (30-39 mg/dL), grade 4 ( $< 30$  mg/dL).

**Supplementary tables 6. Laboratory abnormalities after enrolment: liver function (intention to treat population)**

|                             | <b>n</b> | <b>Gatifloxacin (N=120)</b> | <b>n</b> | <b>Ceftriaxone (N=119)</b> | <b>Comparison (p-value)*</b> |
|-----------------------------|----------|-----------------------------|----------|----------------------------|------------------------------|
| Worst ALT grade             | 113      |                             | 109      |                            | 0.18                         |
| - Grade 0                   |          | 76 (67.3%)                  |          | 67 (61.5%)                 |                              |
| - Grade 1                   |          | 26 (23.0%)                  |          | 26 (23.9%)                 |                              |
| - Grade 2                   |          | 9 (8.0%)                    |          | 10 (9.2%)                  |                              |
| - Grade 3                   |          | 2 (1.8%)                    |          | 6 (5.5%)                   |                              |
| Worst AST grade             | 112      |                             | 109      |                            | 0.11                         |
| - Grade 0                   |          | 68 (60.7%)                  |          | 53 (48.6%)                 |                              |
| - Grade 1                   |          | 28 (25.0%)                  |          | 35 (32.1%)                 |                              |
| - Grade 2                   |          | 12 (10.7%)                  |          | 16 (14.7%)                 |                              |
| - Grade 3                   |          | 4 (3.6%)                    |          | 5 (4.6%)                   |                              |
| Worst total bilirubin grade | 107      |                             | 106      |                            | 0.09                         |
| - Grade 0                   |          | 102 (95.3%)                 |          | 105 (99.1%)                |                              |
| - Grade 1                   |          | 4 (3.7%)                    |          | 1 (0.9%)                   |                              |
| - Grade 2                   |          | 1 (0.9%)                    |          | 0 (0.0%)                   |                              |

\*Based on Cochran-Armitage trend test.

n refers to the number of subjects with at least one non-missing laboratory value after enrolment in each group.

ALT=serum alanine aminotransferase: Upper limit of normal range (ULN): 69 U/L, grade 0 (no elevation, <1.25 ULN), grade 1 (1.25 – 2.5 x ULN), grade 2 (2.6 – 5.0 x ULN), grade 3 (5.1 – 10.0 x ULN), grade 4 (> 10.0 x ULN).

AST=serum aspartate aminotransferase: ULN: 46 U/L, grade 0 (no elevation, <1.25 ULN), grade 1 (1.25 – 2.5 x ULN), grade 2 (2.6 – 5.0 x ULN), grade 3 (5.1 – 10.0 x ULN), grade 4 (> 10.0 x ULN).

Bilirubin: ULN=1.3mg/dl, grade 0 (no elevation, <1.1 ULN), grade 1 (1.1 – 1.5 x ULN), grade 2 (1.6 – 2.5 x ULN), grade 3 (2.6 – 5.0 x ULN), grade 4 (> 5.0 x ULN).



**table 7: Adverse events by treatment group (intention to treat population).**

|                                          | <b>Gatifloxacin<br/>(n=120)</b> | <b>Ceftriaxone<br/>(n=119)</b> | <b>Comparison<br/>(p value)*</b> |
|------------------------------------------|---------------------------------|--------------------------------|----------------------------------|
| Patients with at least one adverse event | 74 (61.7%)                      | 74 (62.2%)                     | 1.00                             |
| Total number of adverse events           | 122                             | 120                            | -                                |
| Number of patients with specific events: |                                 |                                |                                  |
| - Anorexia                               | 6 (5.0%)                        | 2 (1.7%)                       | 0.28                             |
| - Body pain                              | 3 (2.5%)                        | 3 (2.5%)                       | 1.00                             |
| - Burning micturition                    | 0 (0.0%)                        | 1 (0.8%)                       | 0.50                             |
| - Chest pain                             | 1 (0.8%)                        | 2 (1.7%)                       | 0.62                             |
| - Chills/rigors                          | 2 (1.7%)                        | 5 (4.2%)                       | 0.28                             |
| - Common cold                            | 0 (0.0%)                        | 1 (0.8%)                       | 0.50                             |
| - Constipation                           | 4 (3.3%)                        | 1 (0.8%)                       | 0.37                             |
| - Cough                                  | 15 (12.5%)                      | 29 (24.4%)                     | 0.02                             |
| - Diarrhoea                              | 5 (4.2%)                        | 12 (10.1%)                     | 0.08                             |
| - Dizziness                              | 11 (9.2%)                       | 9 (7.6%)                       | 0.82                             |
| - Eye pain                               | 0 (0.0%)                        | 1 (0.8%)                       | 0.50                             |
| - Eyelid swelling                        | 0 (0.0%)                        | 1 (0.8%)                       | 0.50                             |
| - Fever                                  | 1 (0.8%)                        | 0 (0.0%)                       | 1.00                             |
| - Headache                               | 6 (5.0%)                        | 1 (0.8%)                       | 0.12                             |
| - Indigestion                            | 0 (0.0%)                        | 1 (0.8%)                       | 0.50                             |
| - Insomnia                               | 0 (0.0%)                        | 1 (0.8%)                       | 0.50                             |
| - Muscle pain                            | 0 (0.0%)                        | 1 (0.8%)                       | 0.50                             |
| - Nasal bleeding                         | 1 (0.8%)                        | 0 (0.0%)                       | 1.00                             |
| - Nausea                                 | 15 (12.5%)                      | 9 (7.6%)                       | 0.28                             |
| - Oral ulcer                             | 0 (0.0%)                        | 1 (0.8%)                       | 0.50                             |
| - Pain abdomen                           | 10 (8.3%)                       | 18 (15.1%)                     | 0.11                             |
| - Pain at injection site                 | 0 (0.0%)                        | 1 (0.8%)                       | 0.50                             |
| - Rashes on body                         | 1 (0.8%)                        | 0 (0.0%)                       | 1.00                             |
| - Sweating                               | 1 (0.8%)                        | 0 (0.0%)                       | 1.00                             |
| - Throat pain                            | 5 (4.2%)                        | 1 (0.8%)                       | 0.21                             |
| - Vertigo                                | 5 (4.2%)                        | 1 (0.8%)                       | 0.21                             |
| - Vomiting                               | 27 (22.5%)                      | 17 (14.3%)                     | 0.13                             |

All reported adverse events were non-severe (i.e. grade 1 or grade 2).

\*Based on Fisher's exact test.
